# Supplementary material for: Neuroprotective Effects of dl‐3‐n‐Butylphthalide against Doxorubicin‐Induced Neuroinflammation, Oxidative Stress, Endoplasmic Reticulum Stress, and Behavioral Changes
Source: Hindawi journal article supplement (doi:10.1155/2018/9125601), 2018-01-01
Supplement: f1 [file 9125601.f1.pdf]

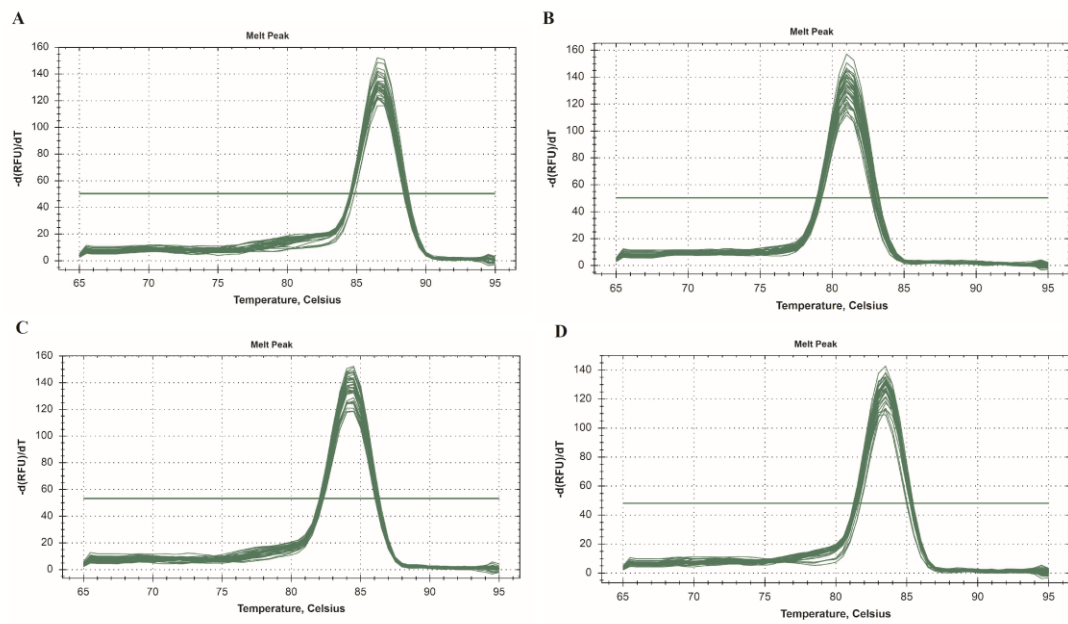

SUPPLEMENT FIGURE 1. The melting curve is shown as fluorescence (RFU) vs. temperature (T). When DNA melts, an abrupt decrease in fluorescence is seen in the form of a negative derivative of the melting curve,  $-d(RFU)/dT$ . Here, the melting temperature for  $\beta$ -actin (FIGURE 1A), IL-1 $\beta$  (FIGURE 1B), IL-6 (FIGURE 1C) and TNF- $\alpha$  (FIGURE 1D) was determined to be 87°C, 81.5°C, 84.5°C and 84 °C respectively.
